# Supplementary material for: Sustainable Plant-Based Biopolymer Membranes for PEM Fuel Cells
Source: MDPI journal article supplement (doi:10.3390/ijms232315245), 2022-12-03
Supplement: s1 [file s1]

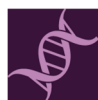

Article

# Sustainable Plant-Based Biopolymer Membranes for PEM Fuel Cells

## Supplementary Materials

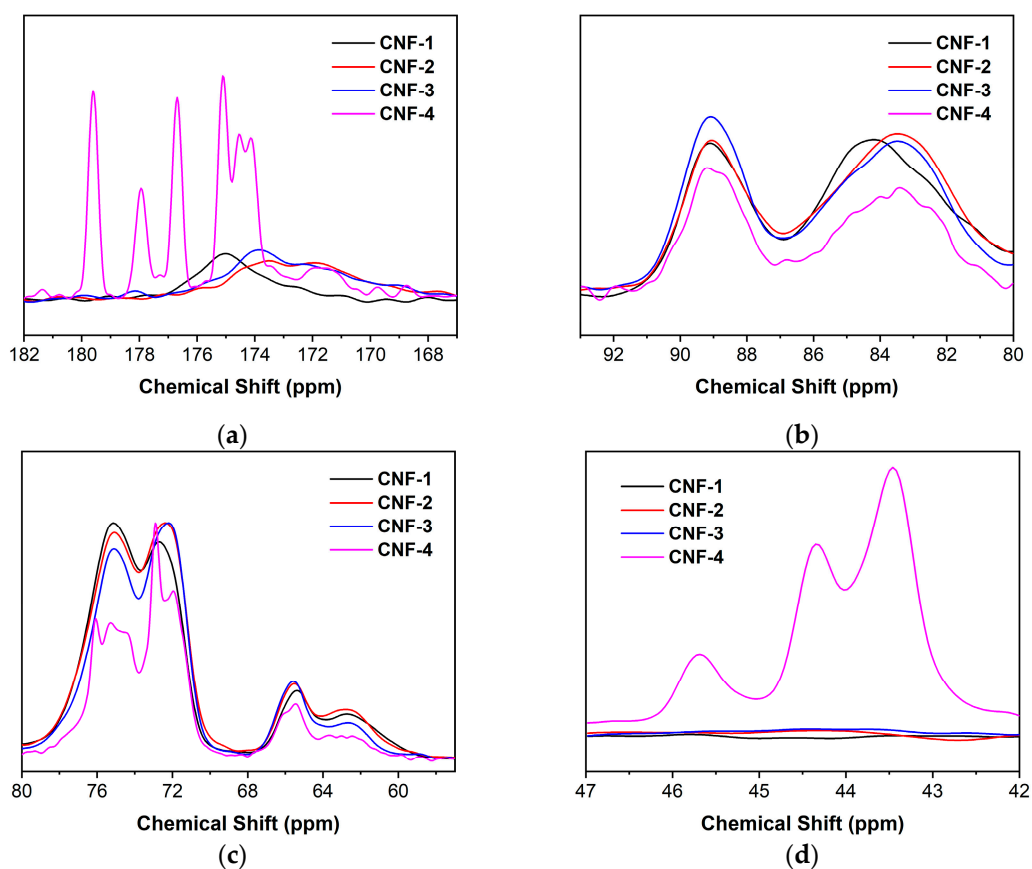

**Figure S1.** Zoom in of  $^{13}\text{C}$  CPMAS NMR spectra of CNF membranes (a) 182–167 ppm, (b) 93–80 ppm, (c) 80–57 ppm, (d) 47–42 ppm.

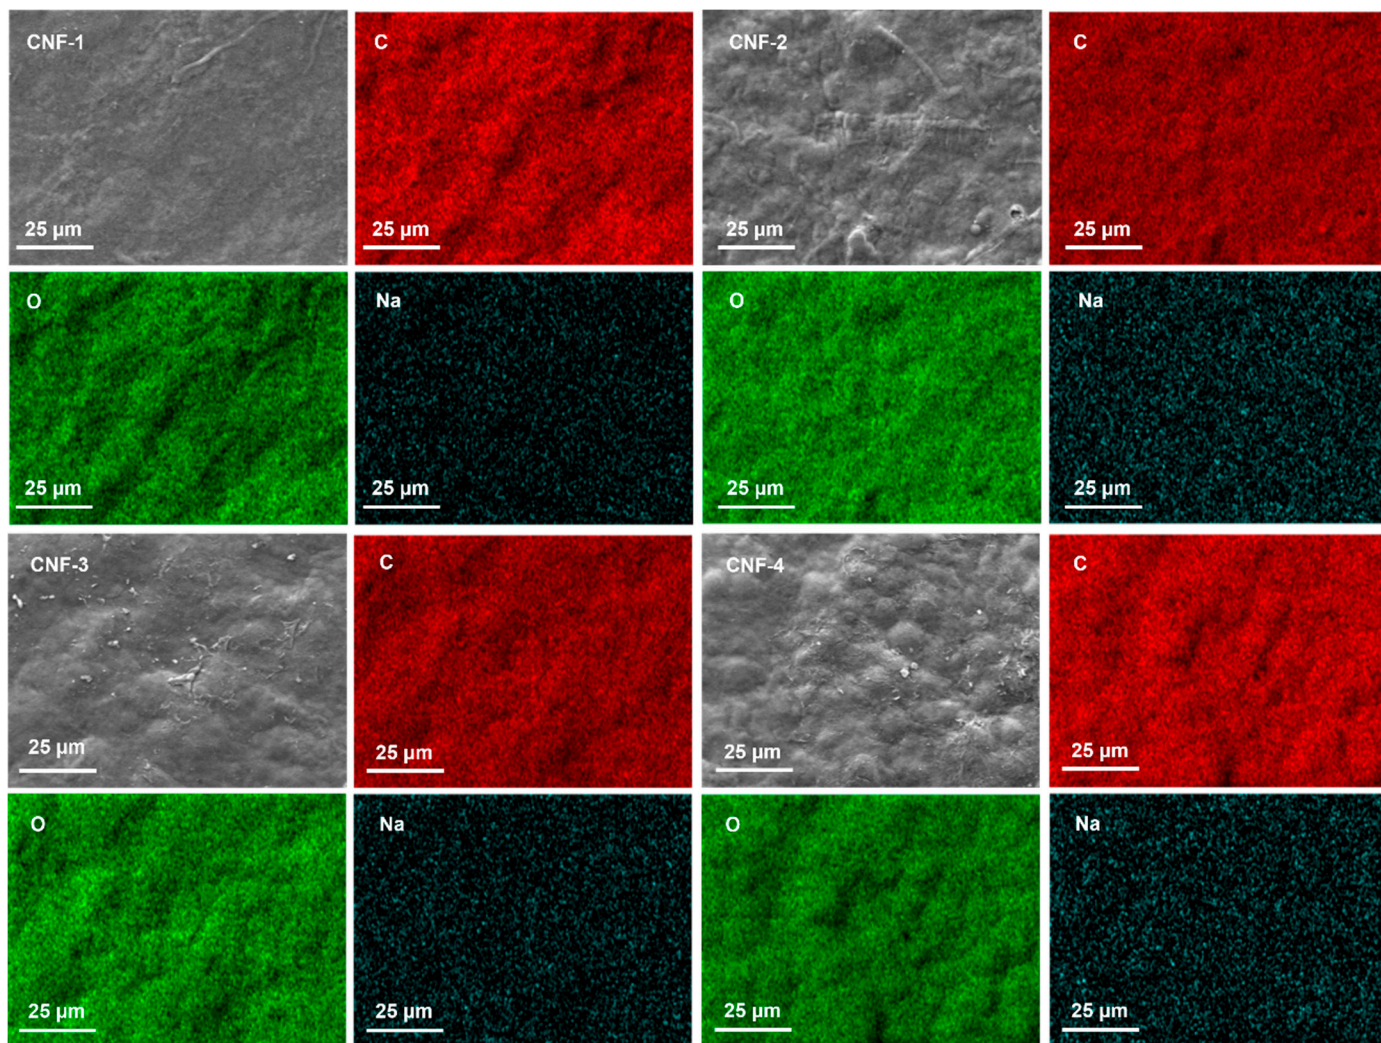

**Figure S2.** CNF membrane SEM and EDX images of the surface-exposed side during solvent casting.

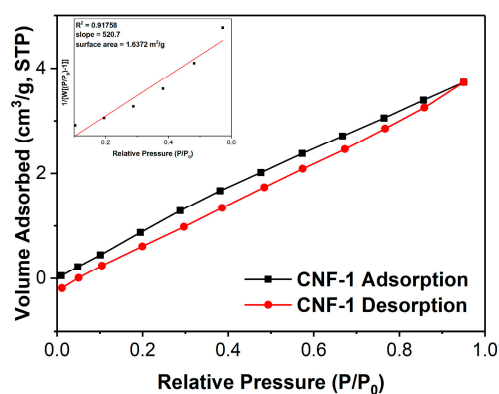

(a)

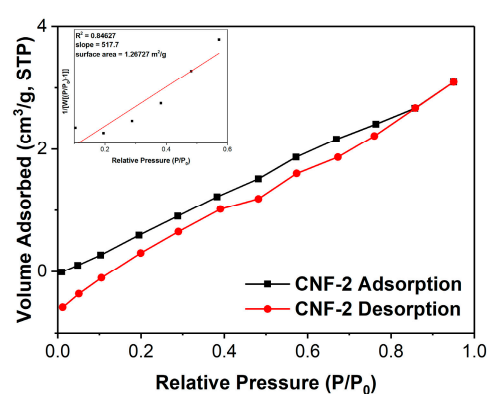

(b)

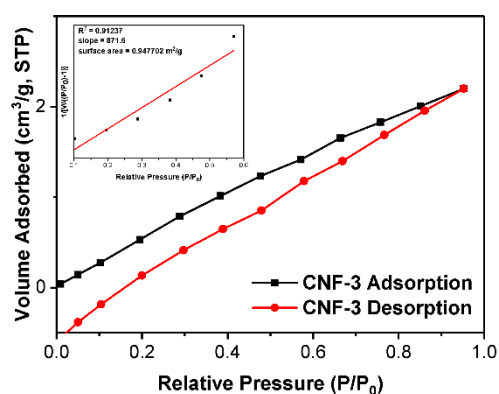

(c)

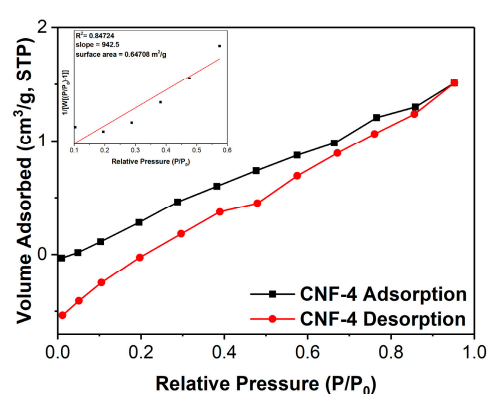

(d)

**Figure S3.** Individual BET isotherms with linear fit (inset) of CNF membranes, (a) CNF-1, (b) CNF-2, (c) CNF-3, (d) CNF-4.

**Table S1.** Crystallinity Index (CI) of CNF membranes estimated by “Segal Method”.

| Crystallinity Index |     |
|---------------------|-----|
| CNF-1               | 76% |
| CNF-2               | 74% |
| CNF-3               | 80% |
| CNF-4               | 75% |
